# Supplementary material
Source: HighWire-hosted journal article supplement (https://jmg.bmj.com/content/54/8/511.2)
Supplement: inline-supplementary-material-1 [file inline-supplementary-material-1.docx]

**Table 2. ASD and SCHZ genes implicated in synaptic activity**

| **Gene** | **Name** | **Function** | **Risk / other** | **References** |
| --- | --- | --- | --- | --- |
| **Neurotransmission** | | | | |
| *GRIN2B* | Glutamate receptor, ionotropic, NMDA 2B | Glutamate neurotransmission | ASD, high de novo mutations | (73) |
| *GRIN2A* | Glutamate receptor, ionotropic, NMDA 2A | Glutamate neurotransmission | SCHZ variants | (40) |
| *GRM3* | Metabotropic Glu receptor 3 | Glutamate neurotransmission | SCHZ variants | (67) |
| *GRIA1* | Glutamate receptor 1 | Glutamate neurotransmission | SCHZ variants | (67) |
| *SRR* | Serine racemase | Glutamate neurotransmission | SCHZ variants | (67) |
| *GABRA3* | GABA receptor subunit alpha-3 | GABA neurotransmission | ASD, high de novo mutations | (97) |
| *GABRB3* | GABA receptor subunit beta-3 | GABA neurotransmission | ASD, de novo mutations | (98) |
| *GABRA4,5* | GABA receptor subunits alpha-4 and 5 | GABA neurotransmission | ASD, de novo mutations | (99, 100) |
| *GABRG3* | GABA acid receptor subunit gamma-3 | GABA neurotransmission | ASD, de novo mutations | (99, 100) |
| *GABRB1* | GABA receptor beta-1 | GABA neurotransmission | ASD, de novo mutations | (99, 100) |
| *GABRQ* | GABA receptor theta | GABA neurotransmission | ASD, de novo mutations | (97) |
| *GLYRA2* | Glycine receptor subunit α2 | Glycine neurotransmission | ASD, de novo mutations | (101) |
| *DRD2* | Dopamine receptor D2 | Main target of anti-psychotic drugs | SCHZ, several mutations | (56) |
| *STXBP5* | Syntaxin –binding protein 5 | docking / fusion of synaptic vesicles with presynaptic membrane | ASD, de novo mutations | (102) |
| *SYTL4* | Synaptotagmin-like 4 | Regulates exocytosis of dense-core granules | ASD, de novo mutations | (97) |
| ***Ion Channels*** | | | | |
| *CACNA1C* | voltage-dependent calcium channel subunit α1 | Activity-dependent transcriptional regulation | ASD + SCHZ + Timothy syndrome | (35) |
| *CACNAD3* | voltage-dependent calcium channel subunit δ 3 | Activity-dependent transcriptional regulation regulatory subunit | ASD, de novo mutations | (35) |
| *CACNB2* | Voltage-dependent L-type Ca channel subunit beta-2 | Activity-dependent transcriptional regulation | SCHZ mutations | (35) |
| *CACNA1I* | Voltage-dependent T-type Ca channel subunit alpha-1I | Activity-dependent transcriptional regulation Pacemaker, modulation of firing patterns of neurons | SCHZ mutations | (67) |
| *CACNA1S* | Voltage-dependent L-type Ca channel alpha-1S | Activity-dependent transcriptional regulation | ASD + SCHZ de novo mutations | (35) |
| *SCN1A, SCN2A* | Sodium channel protein types α 1 and 2 | voltage-dependent sodium ion permeability, sensory perception of mechanical pain | ASD, de novo mutations | (72, 73) |
| *CLCN6* | Chloride channel, voltage sensitive 6 | Voltage-gated Cl channel | ASD + lysosome storage disorder | (103) |
| *KCNMA1* | Potassium large conductance calcium-activated channel, subfamily M, alpha 1 | Potassium channel activated by membrane depolarization and increase in cytosolic Ca2+ | ASD + epilepsy | (57) |
| *KCND2* | Potassium voltage-gated channel, Shal-related 2 | Regulates circadian rhythm in suprachiasmatic nucleus, which regulates circadian rhythm of locomotor activity | ASD + cardiovascular disease | (104) |
| *KCNV1* | Potassium channel V 1 | Modulates KCNB1 and KCNB2 channel activity | ASD, de novo mutations | (105) |
| **Scaffold/cytoskeleton** | | | | |
| *SHANK3* | SH3 and multiple ankyrin repeat domain protein 3 | Postsynaptic density adapter between NMDA and metabotropic Glut receptors and actin-based cytoskeleton | ↑ ASD + Phelan-McDermid Syndrome | (106) |
| *SHANK1, 2* | SH3 and multiple ankyrin repeat domain proteins 1, 2 | Postsynaptic density adapter between NMDA and metabotropic Glut receptors and actin-based cytoskeleton | ASD + SCHZ, de novo mutations | (72) (40) |
| *ACTN1* | Alpha actinin 1 | F-actin cross-linking protein | SCHZ de novo mutations | (40) |
| *ANK2, 3* | Ankyrin-2 and 3 | Attachment of membrane proteins to cytoskeleton | ASD, de novo mutations | (89, 96) |
| *ANK1* | Ankyrin-1 | Attachment of membrane proteins to cytoskeleton | SCHZ de novo mutations | (40) |
| *GPHN* | gephyrin | Microtubule-associated protein, anchors glycine receptor to subsynaptic microtubules | ASD in exonic deletions | (107) |
| *CLTCL1* | Clathrin, heavy chain-like 1 | Intracellular endosome trafficking, distribution of glucose receptor | ASD, de novo mutations | (108) |
| *DCTN5* | Dynactin 5 | Axona transport | ASD, de novo mutations | (73) |
| *KIF1A* | Kinesin-like protein 1A | Motor for anterograde axonal transport of synaptic vesicle precursors | SCHZ de novo mutations | (40) |
| *KIF18A* | Kinesin-like protein KIF18A | Motor for anterograde axonal transport of synaptic vesicle precursors | SCHZ de novo mutations | (40) |
| *BAIAP2* | Brain-specific angiogenesis inhibitor 1-associated protein 2 | Adaptor protein, reorganization of cytoskeleton | SCHZ de novo mutations | (40) |
| *BRSK1* | Serine threonine kinase | localizes to synaptic vesicles and regulates neurotransmitter release by phosphorylating RIMS1, phosphorylates Tau | SCHZ de novo mutations | (40) |
| *DLG1, 2* | Disk-large homologue 1, 2 | Membrane scaffolding, key component of post-synaptic density complex (PSD) | SCHZ de novo mutations | (35) |
| *EPB41, EPB41L1* | Protein 4.1 and Band 4.1-like protein | PSD complex | SCHZ de novo mutations | (40) |
| *GIT1* | ARF GTPase-activating protein | scaffold for signaling modules controlling vesicle trafficking, adhesion and cytoskeletal organization, PSD | SCHZ de novo mutations | (40) |
| *ITSN1* | Intersectin 1 | guanine nucleotide exchange factor (GEF), adapter protein, PSD complex | SCHZ de novo mutations | (40) |
| *MYH11, MYH9* | Myosin 9 and 11 | Cytoskeleton, PSD complex | SCHZ de novo mutations | (40) |
| *MYO18A* | Unconventional myosin 18A | Cytoskeleton, PSD complex | SCHZ de novo mutations | (40) |
| *NCKIPSD* | NCK-interacting protein with SH3 domain | regulation of actin polymerization and cell adhesion, PSD complex | SCHZ de novo mutations | (40) |
| *PTK2B* | Protein tyrosine kinase 2 beta | Non-receptor regulates reorganization of the actin cytoskeleton | SCHZ de novo mutations | (40) (35) |
| *RIMS1* | Regulating synaptic membrane exocytosis protein 1 | scaffold protein that regulates neurotransmitter release at the active zone, PSD complex | SCHZ de novo mutations | (40) |
| *SORBS2* | Sorbin and SH3 domain-containing protein 2 | Adapter protein, assembly of signaling complexes, link between ABL kinases and actin cytoskeleton | SCHZ de novo mutations | (40) |
| *SRCIN1* | SRC kinase signaling inhibitor 1 | negative regulator of SRR, regulates dendritic spine morphology. Involved in calcium-dependent exocytosis | SCHZ de novo mutations | (40) |
| *UNC13A* | Protein UNC-13 homologue A | Synaptic vesicle maturation in most excitatory/glutamatergic synapses | SCHZ de novo mutations | (40) |
| *YWHAZ* | 14-3-3 protein zeta/delta | Adapter protein, PSD complex | SCHZ de novo mutations | (40) |
| ***Cell adhesion/signaling*** | | | | |
| *CNTN6* | Contactin -6 | Cell surface interactions, regulates Notch signaling | ASD, de novo mutations | (109) |
| *NLGN3, 4* | Neuroligin 3, 4 | Cell surface interactions, regulates synapse function and synaptic transmission | ASD, de novo mutations | (110) |
| *NRXN1* | Neurexin 1 | Cell surface interactions, regulation of Ca+ signaling | ASD + SCHZ de novo mutations | (40) (35) |
| *CNTNAP2* | Contactin-associated protein-like 2 | Neuron-glia interaction, K+ channel clustering | ASD + Gilles de la Tourette syndrome | (111) |
| *EPHB2, -6* | Ephrin receptor B6 | Receptor tyrosine kinase binds transmembrane ephrin-B on adjacent cells. regulates axon guidance, dendritic spines and formation of excitatory synapses | ASD, de novo mutations | (18, 73) |
| *LPHN2* | Adhesion G protein-coupled receptor L2 | Calcium-independent Receptor implicated in the regulation of exocytosis. | SCHZ de novo mutations | (40) |
| *NFASC* | Neurofascin | Cell adhesion, ankyrin-binding protein | SCHZ de novo mutations | (40) |
| *PLXNA1* | Plexin-1A | Semaphorin receptor and actin remodeling | SCHZ de novo mutations | (40) |

97. Lee H, Lin MC, Kornblum HI, Papazian DM, Nelson SF. Exome sequencing identifies de novo gain of function missense mutation in KCND2 in identical twins with autism and seizures that slows potassium channel inactivation. *Hum Mol Genet* 2014;23(13):3481-9. doi: 10.1093/hmg/ddu056

98. Codina-Sola M, Rodriguez-Santiago B, Homs A, Homs A, Santoyo J, Rigau M, Aznar-Lain G, Del Campo M, Gener B, Gabau E, Botella MP, Gutierrez-Arumi A, Antinolo G, Perez-Jurado LA, Cusco I. Integrated analysis of whole-exome sequencing and transcriptome profiling in males with autism spectrum disorders. *Mol Autism* 2015;6:21. doi: 10.1186/s13229-015-0017-0

99. Uchino S, Waga C. SHANK3 as an autism spectrum disorder-associated gene. *Brain Dev* 2013;35(2):106-10. doi: 10.1016/j.braindev.2012.05.013

100. Lionel AC, Vaags AK, Sato D, Gazzellone MJ, Mitchell EB, Chen HY, Costain G, Walker S, Egger G, Thiruvahindrapuram B, Merico D, Prasad A, Anagnostou E, Fombonne E, Zwaigenbaum L, Roberts W, Szatmari P, Fernandez BA, Georgieva L, Brzustowicz LM, Roetzer K, Kaschnitz W, Vincent JB, Windpassinger C, Marshall CR, Trifiletti RR, Kirmani S, Kirov G, Petek E, Hodge JC, Bassett AS, Scherer SW. Rare exonic deletions implicate the synaptic organizer Gephyrin (GPHN) in risk for autism, schizophrenia and seizures. *Hum Mol Genet* 2013;22(10):2055-66. doi: 10.1093/hmg/ddt056

101. Chahrour MH, Yu TW, Lim ET, Ataman B, Coulter ME, Hill RS, Stevens CR, Schubert CR, Collaboration AAS, Greenberg ME, Gabriel SB, Walsh CA. Whole-exome sequencing and homozygosity analysis implicate depolarization-regulated neuronal genes in autism. *PLoS Genet* 2012;8(4):e1002635. doi: 10.1371/journal.pgen.1002635

102. Hu J, Liao J, Sathanoori M, Kochmar S, Sebastian J, Yatsenko SA, Surti U. CNTN6 copy number variations in 14 patients: a possible candidate gene for neurodevelopmental and neuropsychiatric disorders. *J Neurodev Disord* 2015;7(1):26. doi: 10.1186/s11689-015-9122-9

103. Jamain S, Quach H, Betancur C, Rastam M, Colineaux C, Gillberg IC, Soderstrom H, Giros B, Leboyer M, Gillberg C, Bourgeron T, Paris Autism Research International, Sibpair S. Mutations of the X-linked genes encoding neuroligins NLGN3 and NLGN4 are associated with autism. *Nat Genet* 2003;34(1):27-9. doi: 10.1038/ng1136

104. Alarcon M, Abrahams BS, Stone JL, Duvall JA, Perederiy JV, Bomar JM, Sebat J, Wigler M, Martin CL, Ledbetter DH, Nelson SF, Cantor RM, Geschwind DH. Linkage, association, and gene-expression analyses identify CNTNAP2 as an autism-susceptibility gene. *Am J Hum Genet* 2008;82(1):150-9. doi: 10.1016/j.ajhg.2007.09.005

105. Egawa J, Watanabe Y, Wang C, Sugimoto A, Sugiyama T, Igeta H, Nunokawa A, Shibuya M, Kushima I, Orime N, Hayashi T, Okada T, Uno Y, Ozaki N, Someya T. Novel rare missense variations and risk of autism spectrum disorder: whole-exome sequencing in two families with affected siblings and a two-stage follow-up study in a Japanese population. *PLoS One* 2015;10(3):e0119413. doi: 10.1371/journal.pone.0119413

106. Ramos PS, Sajuthi S, Langefeld CD, Walker SJ. Immune function genes CD99L2, JARID2 and TPO show association with autism spectrum disorder. *Mol Autism* 2012;3(1):4. doi: 10.1186/2040-2392-3-4

107. Peng Y, Huentelman M, Smith C, Qiu S. MET receptor tyrosine kinase as an autism genetic risk factor. *Int Rev Neurobiol* 2013;113:135-65. doi: 10.1016/B978-0-12-418700-9.00005-8

108. Careaga M, Ashwood P. Autism spectrum disorders: from immunity to behavior. *Methods Mol Biol* 2012;934:219-40. doi: 10.1007/978-1-62703-071-7_12

109. Torres AR, Sweeten TL, Johnson RC, Odell D, Westover JB, Bray-Ward P, Ward DC, Davies CJ, Thomas AJ, Croen LA, Benson M. Common Genetic Variants Found in HLA and KIR Immune Genes in Autism Spectrum Disorder. *Front Neurosci* 2016;10:463. doi: 10.3389/fnins.2016.00463

110. Chien YL, Wu YY, Chen CH, Gau SS, Huang YS, Chien WH, Hu FC, Chao YL. Association of HLA-DRB1 alleles and neuropsychological function in autism. *Psychiatr Genet* 2012;22(1):46-9. doi: 10.1097/YPG.0b013e32834915ae

111. Piton A, Michaud JL, Peng H, Aradhya S, Gauthier J, Mottron L, Champagne N, Lafreniere RG, Hamdan FF, team SD, Joober R, Fombonne E, Marineau C, Cossette P, Dube MP, Haghighi P, Drapeau P, Barker PA, Carbonetto S, Rouleau GA. Mutations in the calcium-related gene IL1RAPL1 are associated with autism. *Hum Mol Genet* 2008;17(24):3965-74. doi: 10.1093/hmg/ddn300
